# Supplementary material
Source: publisher figshare collection journal article supplement (https://sage.figshare.com/ndownloader/files/17470661)
Supplement: Supplementary file 1 [file 17470661]

## Appendix

**Figure A1. Exam Content Outline: Basic Science – Pathology**

| Domain                    | Content Outline                  | Percent |
|---------------------------|----------------------------------|---------|
| <i>General Principles</i> | Cell Biology                     | 1%–5%   |
|                           | Human Development and Genetics   | 1%–5%   |
|                           | Biology of Tissue Response       | 10%–15% |
|                           | Multisystem Processes            | 5%–10%  |
|                           | Microbial Biology and Infection  | 1%–5%   |
|                           | Immune Responses                 | 5%–10%  |
| <i>Organ Systems</i>      | Hematopoietic & Lymphoreticular  | 5%–10%  |
|                           | Central & peripheral nervous     | 5%–10%  |
|                           | Skin & related connective tissue | 5%–10%  |
|                           | Musculoskeletal                  | 1%–5%   |
|                           | Respiratory                      | 1%–5%   |
|                           | Cardiovascular                   | 5%–10%  |
|                           | Gastrointestinal                 | 5%–10%  |
|                           | Renal/urinary                    | 5%–10%  |
|                           | Reproductive                     | 5%–10%  |
|                           | Endocrine                        | 1%–5%   |

Note: The content is organized according to general principles and individual organ systems. General Principles focuses on foundational science concepts that are important across organ systems. Individual Organ Systems are subdivided according to normal and abnormal processes and principles of therapy.

**Figure A2. Exam Content Outline: Clinical Science – Medicine**

| Dimension 1               | Content Outline                                            | Percent |
|---------------------------|------------------------------------------------------------|---------|
| <i>General Principles</i> |                                                            | 1%–5%   |
| <i>Organ Systems</i>      |                                                            | 95%–99% |
|                           | Immunologic Disorders                                      | 5%–10%  |
|                           | Diseases of the Blood and Blood-forming Organs             | 5%–10%  |
|                           | Diseases of the Nervous System and Special Senses          | 5%–10%  |
|                           | Cardiovascular Disorders                                   | 15%–20% |
|                           | Diseases of the Respiratory System                         | 15%–20% |
|                           | Nutritional and Digestive Disorders                        | 10%–15% |
|                           | Gynecologic Disorders                                      | 1%–5%   |
|                           | Renal, Urinary, and Male Reproductive System               | 10%–15% |
|                           | Disorders of the Skin and Subcutaneous Tissues             | 5%–10%  |
|                           | Diseases of the Musculoskeletal System & Connective Tissue | 5%–10%  |
|                           | Endocrine and Metabolic Disorders                          | 5%–10%  |
| Dimension 2               | Content Outline                                            | Percent |
| <i>Physician Tasks</i>    | Promoting Health and Health Maintenance                    | 10%–15% |
|                           | Understanding Mechanisms of Disease                        | 20%–25% |
|                           | Establishing a Diagnosis                                   | 40%–45% |
|                           | Applying Principles of Management                          | 20%–25% |

Note: Dimension 1 forms the main axis for organizing the outline. The first section, General Principles, includes basic concepts such as normal age-related changes. The Organ System section deals with individual disorders. Dimension 2 forms a matrix with Dimension 1 and covers Physician Task across the organ systemsb
